# Supplementary material for: The C-Terminal Region of G72 Increases d-Amino Acid Oxidase Activity
Source: Int J Mol Sci. 2013 Dec 20;15(1):29–43. doi: 10.3390/ijms15010029 (PMC3907796; doi:10.3390/ijms15010029)

# Supplementary Information

**Figure S1.** Prediction of the G72 secondary structure. The secondary structure of G72 was predicted using Hierarchical Neural Network at the ExPASy proteomics server. h, e and c: Residues predicted to have an -helical, -strand, or coil conformation, respectively.

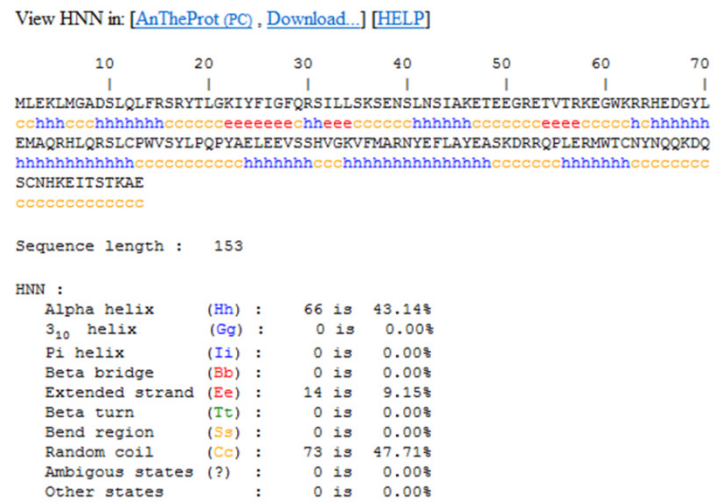

Supplement: Supplementary file 1 [file ijms-15-00029-s002.pdf]
